# Supplementary material
Source: PubMed Central journal article supplement (PMC3164172)
Supplement: mmc1.pdf [file mmc1.pdf]

# SUPPORTING MATERIAL

## STRUCTURED FUNCTIONAL DOMAINS OF MYELIN BASIC PROTEIN: CROSS-TALK BETWEEN ACTIN POLYMERIZATION AND Ca<sup>2+</sup>- DEPENDENT CALMODULIN INTERACTION

Vladimir V. Bamm<sup>1</sup>,  
Miguel De Avila<sup>1</sup>,  
Graham S.T. Smith<sup>1</sup>,  
Mumdooh A.M. Ahmed<sup>2,3</sup>,  
George Harauz<sup>1\*</sup>.

Departments of <sup>1</sup>Molecular and Cellular Biology, and <sup>2</sup>Physics,  
University of Guelph,  
50 Stone Road East,  
Guelph, Ontario, N1G 2W1, Canada.

<sup>3</sup>*Current address:*

Department of Physics, Faculty of Science at Suez, Suez Canal University, Suez, Egypt.

*\*To whom correspondence should be addressed:*

G. Harauz, Department of Molecular and Cellular Biology, University of Guelph, 50 Stone Road East, Guelph, Ontario, N1G 2W1, Canada. E-mail: [gharauz@uoguelph.ca](mailto:gharauz@uoguelph.ca); FAX: 519-837-1802; Telephone: 519-824-4120, x52535.

**Acknowledgments:** This work was supported by a Discovery Grant from the Natural Sciences and Engineering Research Council of Canada (RG121541 to GH). The NMR studies were supported initially and in part by the Canadian Institutes of Health Research (MOP #74468 to GH and Vladimir Ladizhansky). VVB was the recipient of a Postdoctoral Fellowship, and GSTS and MDA were the recipients of Doctoral Studentships, from the Multiple Sclerosis Society of Canada. We are grateful to Mrs. Janine Voyer-Grant and Ms. Stina Nilsson for excellent technical assistance, to Mr. Robert Harris (Manager, Guelph Regional Microscopy Facility) for his help with sample preparation and transmission electron microscopy, and to Ms. Valerie Robertson and Mr. Peter Scheffer of the University of Guelph NMR Centre for instrumental support. We thank Dr. Joan Boggs (Department of Molecular Structure and Function, Hospital for Sick Children, Toronto), Dr. Vladimir Ladizhansky (Department of Physics, University of Guelph), and Dr. David Libich (Laboratory of Chemical Physics, NIDDK/NIH, Bethesda) for helpful discussions and comments on the manuscript.

## SUPPORTING MATERIAL

### MATERIALS AND METHODS

*Materials:* Electrophoresis grade acrylamide, ultrapure TRIS base, and ultrapure Na<sub>2</sub>EDTA were purchased from ICN Biomedicals (Costa Mesa, CA). Other chemicals were reagent grade and acquired from either Fisher Scientific (Unionville, ON) or Sigma-Aldrich (Oakville, ON). The Ni<sup>2+</sup>-NTA (nitrilotriacetic acid) agarose beads were purchased from Qiagen (Mississauga, ON). Dodecylphosphocholine (DPC) was obtained from Avanti Polar Lipids (Alabaster, AL). For uniform labeling of protein or peptide for NMR spectroscopy, the stable isotopic compounds <sup>2</sup>H<sub>2</sub>O (D<sub>2</sub>O), <sup>15</sup>NH<sub>4</sub>Cl, and <sup>13</sup>C<sub>6</sub>-glucose were obtained from Cambridge Isotope Laboratories (C.I.L., Cambridge, MA).

*Construction of MBP- $\alpha$ -peptides:* Three different regions of the gene for murine 18.5 kDa myelin basic protein (MBP) coding for amino acids (A22-K56), (S72-S107), and (S133-S159) (murine MBP sequence numbering, *cf.*, (12;17), and **Figure S1**) were cloned into the Champion™ pET SUMO (*small ubiquitin modifier*) Expression System (Invitrogen Life Technologies, Burlington, ON) and were named  $\alpha$ 1,  $\alpha$ 2, and  $\alpha$ 3, respectively. The pET22b rmMBP plasmid containing the complete open reading frame for 18.5 kDa MBP rmC1 (4) was used as template DNA for all polymerase chain reaction (PCR) amplifications. Synthetic oligonucleotides were purchased from Sigma-Aldrich (Oakville, ON). The PCR products coding for peptide regions (A22-K56), (S72-S107), and (S133-S159) of 18.5 kDa murine MBP were amplified using three (3) forward and reverse primer sets: (i) 5'-GCC AGG CAT GGC TTC CTC CC-3', 5'-TCA CTT GCC AGA GCC CCG CT-3' (for the  $\alpha$ 1-peptide); (ii) 5'-TCG CAG CAC GGC CGG ACC CA-3', 5'-TCA GGA CAG GCC TCT CCC CT-3' (for the  $\alpha$ 2-peptide); and (iii) 5'-TCG GCT CAC AAG GGA TTC AAG G-3', 5'-TCA GCT GTC TCT TCC TCC CAG C-3' (for the  $\alpha$ 3-peptide). All PCR reactions were performed using *Taq* polymerase (Invitrogen Life Technologies) with the following cycle parameters: initial denaturation temperature of 92°C for 10 min, 25 cycles of 92°C for 1 min, 55°C for 30 s, 72°C for 1 min, followed by a final extension of 72°C for 7 min. The PCR products were ligated and TA-cloned directly into the pET SUMO vector, and positive plasmids were confirmed by sequencing (Laboratory Services Division, University of Guelph). Subsequent plasmids coding for SUMO-MBP- $\alpha$ -peptide fusion proteins were transformed into *E. coli* BL21-CodonPlus (DE3)-RP cells (Stratagene, La Jolla, CA) and were expressed and purified as described below.

*Expression and purification of full-length 18.5 kDa recombinant murine MBP (rmC1):* The unmodified 18.5 kDa recombinant murine MBP isoform (rmC1) was expressed in *E. coli* BL21-CodonPlus(DE3)-RP cells (Stratagene, La Jolla, CA) and purified by nickel-affinity chromatography, followed by ion exchange chromatography to remove minor contaminating material as previously described (4;17). Protein eluate from the column was dialyzed and lyophilized as previously published (2). Protein concentration was determined by measuring the absorbance at 280 nm, using the extinction coefficient  $\epsilon=0.676 \text{ Lg}^{-1}\text{cm}^{-1}$  (as calculated by SwissProt for protein in 6.0 M guanidium hydrochloride, 0.02 M phosphate buffer, pH 6.5). Purity of the protein preparation was assayed by SDS-polyacrylamide gel electrophoresis (SDS-PAGE) with Coomassie blue staining.

*Expression and purification of MBP- $\alpha$ -peptides:* Three MBP- $\alpha$ -peptides ( $\alpha$ 1,  $\alpha$ 2, and  $\alpha$ 3) fused to His-tagged SUMO at their N-terminus were expressed in *E. coli* BL21-CodonPlus(DE3)-RP cells (Stratagene, La Jolla, CA). Cells were grown at 37°C in 130 mL LB kanamycin (kan)<sup>+</sup>-chloramphenicol (cam)<sup>+</sup> (25  $\mu$ g/mL and 33  $\mu$ g/mL, respectively) until an A<sub>600nm</sub>~1.0 was reached. Cells were harvested by centrifugation, and the pellet was suspended in 1 L M9 minimal media (kan)<sup>+</sup>-chloramphenicol (cam)<sup>+</sup> (25  $\mu$ g/mL and 33  $\mu$ g/mL, respectively), and further grown at 37°C until A<sub>600nm</sub>~0.7–0.8. The culture was then induced with 1 mM isopropyl- $\beta$ -D-thiogalactopyranoside (IPTG) and grown for a further 4-5 h. Cells were harvested by centrifugation, and the pellet was frozen at -20°C until used.

The following procedure was applied for each MBP- $\alpha$ -peptide construct. Frozen pellets from the 1 L culture were suspended in 30 mL lysis buffer (phosphate-buffered saline (PBS), pH 8.0, 150 mM NaCl, 1% v/v Tween-20, 10 mM imidazole, 1 mM phenylmethylsulfonylfluoride (PMSF)), homogenized and sonicated on ice six times for 10 s, with 10 s cooling between bursts. Lysates were centrifuged at 25,000 g for 30 min at 4°C to pellet cell debris, and the supernatants were applied to a column containing a 4 mL bed volume of Ni<sup>2+</sup>-NTA pre-equilibrated with lysis buffer. The column was washed with 40 mL of lysis buffer, followed by another 40 mL of wash buffer (PBS, pH 8.0, 15 mM imidazole), and finally, SUMO-fused MBP- $\alpha$ -peptides were eluted with 25 mL of elution buffer (PBS, pH 8.0, 0.5 M imidazole). Samples from 1.3 mL fractions eluted from these columns were evaluated by discontinuous SDS-PAGE (5% stacking, 14% separating), and pure fractions of each SUMO-fused peptide, separately, were combined and dialyzed against protease buffer (10% glycerol in PBS, pH 8.0), two changes of 2 L each.

Following dialysis, SUMO was removed by Ulp1 protease at a 1:1000 protease to SUMO-peptide w/w ratio at 30°C for 3 h in the presence of 2 mM dithiothreitol (DTT). Recombinant SUMO Ulp1 protease was expressed from a pET28b plasmid (Novagen, Gibbstown, NJ) containing His-tagged Ulp(403-621), which was a kind gift from Dr. Christopher Lima (Sloan-Kettering Institute, NY) (23). Digestion mixtures were applied onto three Ni<sup>2+</sup>-NTA (4 mL bed volume) columns pre-equilibrated with protease buffer. The columns were washed with 20 mL of 10 mM imidazole in protease buffer (wash 1), followed by another 20 mL of 15 mM imidazole in the same buffer (wash 2), and bound material was eluted in 20 mL of 0.5 M imidazole in protease buffer. Using Tricine-PAGE (28), MBP- $\alpha$ -peptides were detected in the flow-through and two wash fractions.

The MBP- $\alpha$ -peptides were further purified by reversed-phase high-performance liquid chromatography (HPLC) using a Waters (Mississauga, ON) apparatus with a Symmetry 300 C18, 5 mm, 4.6 x 250 mm column. Acetonitrile constituted the mobile phase, and 0.1% TFA (trifluoroacetic acid) was the ion-pairing agent. Detection was at 214 nm, the flow rate was 1 mL/min, and the column was maintained at 22°C. The elution gradient was begun at 80% Solvent A (ddH<sub>2</sub>O with 0.1% TFA) and 20% Solvent B (acetonitrile with 0.1% TFA), and run at a rate of 1% Solvent B/min for 30 min, followed by 5% Solvent B/min for 10 min. Peptides were collected and their purity was assessed using the same method. To confirm the molecular mass, a sample of each MBP- $\alpha$ -peptide was analyzed by matrix-assisted laser desorption/ionization-time-of-flight (MALDI-TOF) mass spectrometry (Protein Analysis Facility, Hospital for Sick Children, Toronto, ON).

The results obtained from these purification procedures are presented in **Figure S2**.

*Purification of calmodulin:* The expression vector for recombinant *Xenopus laevis* calmodulin (CaM) was obtained from Dr. M. Ikura (Ontario Cancer Institute, Toronto, ON), and this protein was expressed in *E. coli* and purified as described (27).

*Purification of actin from chicken muscle:* Chicken muscle acetone powder was prepared, and actin was extracted from 8 g of it at a time as described (26). The purity of actin was checked using MALDI-TOF mass spectrometry, supported by SDS-PAGE, and it was clear that no further purification steps were required. Protein concentration was determined by measuring the absorbance at 280 nm, using the extinction coefficient  $\epsilon=0.62 \text{ Lg}^{-1}\text{cm}^{-1}$ . The protein suspended in G-buffer (2 mM TRIS-HCl, pH 8.0, 0.2 mM ATP, 0.2 mM  $\text{CaCl}_2$ , and 0.2 mM 2-mercaptoethanol) was aliquoted into 1.5 mL microfuge tubes, flash frozen in liquid nitrogen, and stored at  $-80^\circ\text{C}$ . The pyrene labeling of actin was performed as previously published (16).

*Circular dichroism (CD) spectroscopy:* The experiments were performed using a Jasco J-815 spectropolarimeter (Japan Spectroscopic Co., Tokyo, Japan) using an initial peptide concentration of 0.5 mg/mL in a sample volume of 150  $\mu\text{L}$  in a quartz demountable cuvette with a path length of 0.05 cm. The far-UV CD spectra (180–250 nm) were scanned at a rate of 50 nm/min, with data collection at 1 nm intervals at  $30^\circ\text{C}$ . The blank was subtracted after each measurement, and the spectra from six successive scans were averaged for each sample. The molar ellipticities were calculated using the MBP- $\alpha$ -peptide concentrations and molar mass. The CD measurements were carried out for each MBP- $\alpha$ -peptide in the following solutions: (i)  $\text{ddH}_2\text{O}$ ; (ii) CD buffer (20 mM Tris- $\text{H}_2\text{SO}_4$ , pH 7.4, 100 mM  $\text{Na}_2\text{SO}_4$ ); (iii) 10% TFE in CD buffer; (iv) 20% TFE in CD buffer; (v) 30% TFE in CD buffer; (vi) 40% TFE in CD buffer; (vii) 50% TFE in CD buffer; (viii) 0.5 mM DPC in CD buffer; (ix) 1 mM DPC in CD Buffer; (x) 10 mM DPC in CD buffer; and (xi) 30 mM DPC in CD buffer.

The results obtained from these CD experiments are presented in **Figure S3**.

To study the  $\alpha 1$ - and  $\alpha 3$ -peptide interactions with  $\text{Ca}^{2+}$ -CaM, CD spectra were collected using a demountable cuvette with a path-length of 0.01 cm in the buffer comprising 20 mM HEPES-KOH, pH 7.4, 100 mM KCl, 5 mM  $\text{CaCl}_2$  [*cf.*, (20)]. For this experiment, we used 0.5 mg/mL peptides (131  $\mu\text{M}$  and 176  $\mu\text{M}$ , for  $\alpha 1$  and  $\alpha 3$ , respectively) with equimolar amounts of  $\text{Ca}^{2+}$ -CaM.

*Isothermal titration calorimetry (ITC):* Experiments were carried out using a VP-ITC instrument (Microcal, Inc., Northampton, MA). Lyophilized apo-calmodulin (apoCaM) was dissolved in 20 mM HEPES-KOH, pH 7.4, 100 mM KCl, 5 mM  $\text{CaCl}_2$ , and was extensively dialyzed against the same solution (at least 4 changes). Following the dialysis, the protein was filtered (0.22  $\mu\text{m}$  pore size) and the concentration was estimated from the absorbance at 280 nm = 1.48 (1%, 1 cm). The MBP- $\alpha$ -peptides were dissolved in the same solution prior to experiment at the concentration range of 0.9-1 mM. Samples were degassed in a Thermovac (Northampton, MA) at  $30^\circ\text{C}$  for 10 min. The MBP- $\alpha$ -peptide (either  $\alpha 1$ ,  $\alpha 2$ , or  $\alpha 3$ ) solution (0.9-1.0 mM) was injected into the sample cell, containing  $\text{Ca}^{2+}$ -CaM (0.07-0.10 mM) in the above solution. Typically, the titrations were carried out with a preliminary injection of 2  $\mu\text{L}$  followed by 28 injections of 10  $\mu\text{L}$  of

peptide solution with 300 s spacing between each. All experiments were carried out at 30°C. Before analysis, data from the preliminary 2  $\mu\text{L}$  injection were discarded, and heats of dilution of the peptide into solution of 20 mM HEPES-KOH, pH 7.4, 100 mM KCl, 5 mM  $\text{CaCl}_2$  (in the absence of CaM) were subtracted from the “peptide into CaM” titration experiments. The corrected data were integrated and plotted as a function of the molar ratio, and the binding isotherms obtained were fitted to the Origin “one set of sites” model (Origin 5.0, Microcal). To study the effect of  $\text{Ca}^{2+}$ , the same experiments were performed in the  $\text{Ca}^{2+}$ -depleted buffer (20 mM HEPES-KOH, pH 7.4, 100 mM KCl, 8 mM EDTA, 2 mM EGTA).

The thermodynamic parameters derived from these ITC experiments are presented in **Table S1**.

*Actin polymerization assay:* Actin polymerization was followed by measuring an increase in fluorescence intensity of pyrene-labeled actin via an automated microplate fluorescence reader (Polarstar Omega, BMG Laboratory Technologies) using a 367-10 nm filter for excitation and a 407-10 nm filter for emission channels. The stock of 15  $\mu\text{M}$  G-actin was prepared in G-buffer by mixing pyrene-labeled actin with unlabeled actin to a final proportion of 5% label, and 33  $\mu\text{L}$  were added to each well followed by an additional volume of G-buffer calculated to give a final volume of 100  $\mu\text{L}$  after addition of MBP- $\alpha$ -peptides. Stocks of MBP- $\alpha$ -peptides were also prepared in G-buffer at a concentration of 33.75  $\mu\text{M}$  and different volumes were automatically injected across the half area 96-well plate to reach the final volume of 100  $\mu\text{L}$  in each well. Thus, the concentration of MBP- $\alpha$ -peptide ranged from 0.5  $\mu\text{M}$  to 22.5  $\mu\text{M}$  or from 1:0.1 to 1:4.5 [actin]:[ $\alpha 1/\alpha 2/\alpha 3$ ] molar ratio. In the case of the N-terminal MBP- $\alpha$ -peptide ( $\alpha 1$ ), to reach a higher molar ratio, the stock was prepared at a concentration of 60  $\mu\text{M}$ , and different volumes were injected to reach a 1:8 molar ratio of actin to  $\alpha 1$ -peptide. The plate was mixed for 10 s, and the emission intensity was measured for 30 min at 30°C.

In the experiments where the effect of dodecylphosphocholine (DPC) on  $\alpha 1$ -induced actin polymerization was studied, 33.75  $\mu\text{M}$  stock of the peptide was prepared in G-buffer in the presence of 27 mM DPC. To determine the effect of  $\text{Ca}^{2+}$ -CaM on MBP- $\alpha$ -peptide-induced actin polymerization, we used a previously described method (5). Briefly, to 1.1 nmol of G-actin in 450  $\mu\text{L}$  G-buffer, we added 13.3 nmol of MBP- $\alpha$ -peptide in 20  $\mu\text{L}$  G-buffer, and followed the increase in pyrene fluorescence intensity (excitation at 365 nm and emission at 407 nm) for 30 min. After a plateau was achieved, 13.3 nmol  $\text{Ca}^{2+}$ -CaM in 53.2  $\mu\text{L}$  G-buffer was added and the emission was measured for another 30 min. The experiment was performed at 30°C and the final molar ratio of [actin]:[MBP- $\alpha$ -peptide]:[ $\text{Ca}^{2+}$ -CaM] was 1:12:12, respectively.

*Transmission electron microscopy (TEM):* Transmission electron microscopy was used to examine the morphology of the MBP- $\alpha$ -peptide-induced F-actin assemblies. Samples were prepared and examined at a 4.5 (or 6.5) to 1 [MBP- $\alpha$ -peptide]:[actin] molar ratio as previously described (1;2).

The results of these analyses are presented in **Figure S4**.

*Analysis of actin bundling:* To test the ability of  $\alpha 1$  to bundle actin in the presence or absence of dodecylphosphocholine (DPC), samples were prepared at a 1:1, 1:4.5, 1:6, and 1:8 actin to peptide molar ratios in a final volume of 600  $\mu\text{L}$ . The samples were incubated at 30°C for 30 min

followed by centrifugation at 18,000g for 2 h. Pellets and supernatants were analyzed by SDS-PAGE for the presence of actin and  $\alpha$ 1-peptide as previously described (2). The amount of DPC bound to the peptide upon interaction with actin was determined by the Micro-Bartlett phosphorus assay (3). The amount of  $\alpha$ 1 bound to actin was determined by analysis of the HPLC profile of the resuspended pellets and comparing the integrated areas of peak related to the MBP- $\alpha$ -peptide to a standard curve obtained from running samples with known amount of MBP- $\alpha$ -peptide under the same chromatographic conditions.

A demonstration of this actin assembly assay is presented in **Figure S5**.

*Solution NMR spectroscopy:* For solution NMR spectroscopy of the interaction of the  $\alpha$ 1- or  $\alpha$ 3-peptides of 18.5 kDa mMBP with calcium-activated calmodulin ( $\text{Ca}^{2+}$ -CaM), uniformly  $^{13}\text{C}$ ,  $^{15}\text{N}$ -labeled  $\alpha$ 1- or  $\alpha$ 3-peptide was prepared as described before, but this time the M9 minimal media was supplemented with  $^{15}\text{NH}_4\text{Cl}$ , and  $^{13}\text{C}_6$ -glucose (C.I.L., Cambridge, MA). The freeze-dried peptide was dissolved in the NMR sample buffer composed of 20 mM HEPES, pH 7.4, 100 mM KCl, 5 mM  $\text{CaCl}_2$ , and 90%  $\text{H}_2\text{O}/10\%$   $\text{D}_2\text{O}$ . For titration experiments, the initial peptide concentration was 1.5 mM. Then, unlabeled CaM was titrated by adding CaM stocks dissolved in NMR sample buffer stepwise to achieve  $[\alpha 3]:[\text{CaM}]$  molar ratios of 0.1, 0.2, 0.3, 0.5, 0.8, 0.9, 1.0, 1.1, and 1.2 (ditto for the  $\alpha$ 1-peptide). In other titration experiments, the  $\alpha$ 3- $\text{Ca}^{2+}$ -CaM complex was titrated with EDTA-EGTA to prove the  $\text{Ca}^{2+}$ -dependence of the interaction.

A series of two-dimensional  $^1\text{H}$ - $^{15}\text{N}$  heteronuclear single-quantum coherence (HSQC) (6;13;25;30) spectra was collected for the  $\alpha$ 1- or  $\alpha$ 3- $\text{Ca}^{2+}$ -CaM sample at each of the molar ratios. For sequence-specific resonance assignments of the  $\alpha$ 3-peptide alone in solution, another sample was prepared at molar concentration of 1.6 mM in the same NMR buffer. All spectra were collected on a Bruker Avance III spectrometer operating at a proton Larmor frequency of 600.13 MHz and equipped with a triple resonance cryogenic-operated probe. All resonance assignments were done at 22°C. Sequential connectivities of backbone resonances were established using the standard Bruker suite of 3D heteronuclear experiments: HNCO (9;29), HN(CA)CO (7;14), HNCACB (24;31), and CBCA(CO)NH (10;24). The acquisition parameters for all spectra are summarized in **Table S2**. All spectra were processed using NMRPipe (8) as follows: a cosine-squared window function was applied in all dimensions; then the time domains were zero-filled up to 512 x 512 x 2048 complex points in the  $F_1$  x  $F_2$  x  $F_3$  dimensions, respectively, prior to Fourier transformation. Details of the backbone resonance assignments are given next.

*Backbone resonance assignments:* All sequence-specific assignments were done within the environment of CARA (Computer-Aided Resonance Assignment) (15) and using a set of in-house scripts written in LUA (www.lua.org), and executed using the built-in LUA interpreter. The first script used the HNCO spectrum to pick peaks and create spin-systems automatically, based on  $^{13}\text{C}$ ,  $^{15}\text{N}$ , and  $^1\text{H}$  ppm values of  $^{13}\text{C}^{\alpha}[i-1]$ ,  $^{15}\text{N}[i]$ , and  $^1\text{H}^{\text{N}}[i]$ , respectively. Then, another script picked and assigned  $\text{C}^{\alpha}[i]$  for each spin-system from HN(CA)CO followed by picking and assigning  $\text{C}^{\alpha}[i]$ ,  $\text{C}^{\alpha}[i-1]$ ,  $\text{C}^{\beta}[i]$ , and  $\text{C}^{\beta}[i-1]$  of each spin-system from CBCA(CO)NH and HNCACB and two other LUA scripts. The created spin-systems were then linked based on the predecessor/successor matching scores calculated by CARA, based on the matching of  $\text{C}^{\alpha}[i]$ - $\text{C}^{\alpha}[i-1]$ ,  $\text{C}^{\alpha}[i]$ - $\text{C}^{\alpha}[i-1]$ , and  $\text{C}^{\beta}[i]$ - $\text{C}^{\beta}[i-1]$  pairs of spins. Linking the spin-systems and matching the

fragments of spin-systems to fragments of the amino acid sequence of the peptide was done manually due to the simplicity of the sequence. **Figure S6** shows an example of a fragment of spin-systems after assignment of the  $\alpha 3$ -peptide.

The  $^1\text{H}$ - $^{15}\text{N}$  HSQC spectra of both the  $\alpha 3$ -peptide (**Figure S7**), and the  $\alpha 1$ -peptide (**Figure S8**), demonstrated peak shifts upon interaction with  $\text{Ca}^{2+}$ -CaM. Since the C-terminal  $\alpha 3$ -peptide is the primary CaM-target originally predicted (17-19;21), we analyzed it in detail first. (Solid-state and solution NMR structural studies of the  $\alpha 1$ -peptide in association with actin and with  $\text{Ca}^{2+}$ -CaM, respectively, are currently underway and will be part of a future publication.) Here, current backbone assignments are provided in **Tables S3** and **S4** for the  $\alpha 3$ -peptide alone and complexed with  $\text{Ca}^{2+}$ -CaM, respectively.

## SUPPORTING TABLES and FIGURES

**Table S1:** Summary of thermodynamic parameters obtained from ITC for the interaction of the  $\alpha$ 1- and  $\alpha$ 3-peptides with  $\text{Ca}^{2+}$ -CaM.

| Peptide    | $n$             | $K_a, \text{M}^{-1}$   | $\Delta H,$<br>$\text{kcal mol}^{-1}$ | $-T\Delta S,$<br>$\text{kcal mol}^{-1}$ |
|------------|-----------------|------------------------|---------------------------------------|-----------------------------------------|
| $\alpha$ 1 | $1.02 \pm 0.01$ | $(8.13 \pm 0.90) 10^5$ | $-6.51 \pm 0.07$                      | $-1.69 \pm 0.18$                        |
| $\alpha$ 3 | $1.07 \pm 0.01$ | $(2.08 \pm 0.27) 10^5$ | $-5.41 \pm 0.07$                      | $-2.14 \pm 0.32$                        |

All measurements were carried out in triplicate at 30°C. The values shown represent the fitting parameters obtained using the “one set of sites” model. For each variant, “ $K_a$ ” is the association constant, “ $\Delta H$ ” is the change in enthalpy, “ $\Delta S$ ” is the change in entropy, and “ $n$ ” is the number of ligands bound. Errors correspond to 95% confidence levels in the determination of the parameters. The “ $-T\Delta S$ ” is presented as the mean  $\pm$  standard deviation of at least 3 independent experiments.



**Table S2:** Summary of NMR acquisition parameters<sup>a,b</sup>.

| Acquisition Parameter<br>Spectrum | Transients | Carrier Frequency (ppm) |            |       | Sweep Width (ppm) |           |       | Number of Points |             |       | Quadrature Detection <sup>a</sup> |               |
|-----------------------------------|------------|-------------------------|------------|-------|-------------------|-----------|-------|------------------|-------------|-------|-----------------------------------|---------------|
|                                   |            | $F_1$                   | $F_2$      | $F_3$ | $F_1$             | $F_2$     | $F_3$ | $F_1$            | $F_2$       | $F_3$ | $F_1$                             | $F_2$         |
| HNCACB                            | 8          | 40                      | 118        | 4.7   | 76                | 35        | 14    | 144              | 44          | 2048  | S-TPPI                            | <b>S-TPPI</b> |
| CBCA(CO)NH                        | 8          | 40                      | 118        | 4.7   | 76                | 35        | 14    | 144              | 44          | 2048  | S-TPPI                            | <b>S-TPPI</b> |
| HNCO                              | 16         | 175                     | 118        | 4.7   | 25                | 35        | 14    | 72               | 44          | 2048  | S-TPPI                            | <b>S-TPPI</b> |
| HN(CA)CO                          | 16         | 175                     | 118        | 4.7   | 25                | 35        | 14    | 72               | 44          | 2048  | S-TPPI                            | <b>S-TPPI</b> |
| <b>HSQC</b>                       | <b>10</b>  | <b>115</b>              | <b>4.7</b> | -     | <b>30</b>         | <b>16</b> | -     | <b>128</b>       | <b>2048</b> | -     | <b>E-A-E</b>                      | -             |

<sup>a</sup> S-TPPI = States-TPPI (22), E-A-E = Echo-AntiEcho (13).

**Table S3.** The  $^1\text{H}$  and  $^{13}\text{C}$  chemical shifts of the 18.5 kDa murine MBP  $\alpha$ 3-peptide alone in 20 mM HEPES-KOH, pH 7.4, 100 mM KCl, 5 mM  $\text{CaCl}_2$ , and 90%  $\text{H}_2\text{O}/10\%$   $\text{D}_2\text{O}$ , referenced to DSS (2,2-dimethyl-2-silapentane-5-sulfonic acid).

| #    | AA  | $\text{H}_\text{N}$ | N       | $\text{C}'$ | $\text{C}^\alpha$ | $\text{C}^\beta$ |
|------|-----|---------------------|---------|-------------|-------------------|------------------|
| 133' | Ser | -                   | -       | -           | -                 | -                |
| 134' | Ala | -                   | -       | -           | -                 | -                |
| 135' | His | -                   | -       | -           | -                 | -                |
| 136' | Lys | -                   | -       | -           | -                 | -                |
| 137' | Gly | 7.899               | 109.787 | 170.759     | 42.318            | -                |
| 138' | Phe | 8.125               | 120.315 | 173.054     | 55.029            | 36.994           |
| 139' | Lys | 8.406               | 124.211 | 173.737     | 53.619            | 30.092           |
| 140' | Gly | 8.434               | 110.266 | 170.905     | 42.393            | -                |
| 141' | Ala | 8.118               | 123.528 | 174.714     | 49.760            | 16.510           |
| 142' | Tyr | 8.208               | 119.289 | 172.761     | 55.104            | 35.881           |
| 143' | Asp | 8.173               | 122.502 | 173.347     | 50.947            | 38.404           |
| 144' | Ala | 8.208               | 124.690 | 175.398     | 50.428            | 16.139           |
| 145' | Asn | 8.331               | 117.991 | 174.079     | 53.619            | 26.307           |
| 146' | Gly | 8.297               | 109.241 | 171.882     | 42.635            | -                |
| 147' | Thr | 8.105               | 114.368 | 172.093     | 59.705            | 66.904           |
| 148' | Leu | 8.317               | 124.348 | 174.812     | 52.803            | 39.443           |
| 149' | Ser | 8.221               | 116.418 | 171.882     | 55.920            | 60.967           |
| 150' | Lys | 8.242               | 123.049 | 173.542     | 53.842            | 30.092           |
| 151' | Ile | 7.927               | 120.588 | 173.249     | 58.443            | 35.807           |
| 152' | Phe | 8.255               | 124.553 | 172.663     | 55.104            | 36.920           |
| 153' | Lys | 8.160               | 123.528 | 173.298     | 53.248            | 30.463           |
| 154' | Leu | 8.294               | 123.953 | 175.153     | 52.803            | 39.443           |
| 155' | Gly | 8.481               | 110.266 | 171.931     | 42.486            | -                |
| 156' | Gly | 8.290               | 108.694 | 171.345     | 42.465            | -                |
| 157' | Arg | 8.242               | 120.315 | 173.347     | 53.396            | 28.162           |
| 158' | Asp | 8.475               | 121.409 | 172.517     | 51.764            | 38.479           |
| 159' | Ser | 7.824               | 120.725 | 175.788     | 57.182            | 62.154           |

**Table S4.** Resonance assignments of the 18.5 kDa murine MBP  $\alpha$ 3-peptide complexed with  $\text{Ca}^{2+}$ -CaM in 20 mM HEPES-KOH, pH 7.4, 100 mM KCl, 5 mM  $\text{CaCl}_2$ , and 90%  $\text{H}_2\text{O}/10\%$   $\text{D}_2\text{O}$ , referenced to DSS (2,2-dimethyl-2-silapentane-5-sulfonic acid).

| #    | AA  | $\text{H}_\text{N}$ | N       | $\text{C}'$ | $\text{C}^\alpha$ | $\text{C}^\beta$ |
|------|-----|---------------------|---------|-------------|-------------------|------------------|
| 133' | Ser | -                   | -       | -           | -                 | -                |
| 134' | Ala | 8.765               | 124.382 | 177.351     | 52.612            | 19.014           |
| 135' | His | 8.614               | 117.956 | 174.482     | 55.412            | 28.813           |
| 136' | Lys | 8.559               | 122.468 | 177.159     | 56.381            | 32.905           |
| 137' | Gly | 8.573               | 109.480 | 177.124     | 45.612            | -                |
| 138' | Phe | 8.231               | 118.913 | -           | -                 | -                |
| 139' | Lys | -                   | -       | -           | -                 | -                |
| 140' | Gly | -                   | -       | -           | -                 | -                |
| 141' | Ala | -                   | -       | -           | -                 | -                |
| 142' | Tyr | -                   | -       | -           | -                 | -                |
| 143' | Asp | -                   | -       | -           | -                 | -                |
| 144' | Ala | -                   | -       | -           | -                 | -                |
| 145' | Asn | -                   | -       | -           | -                 | -                |
| 146' | Gly | -                   | -       | -           | -                 | -                |
| 147' | Thr | -                   | -       | -           | -                 | -                |
| 148' | Leu | 8.094               | 111.667 | -           | 54.119            | -                |
| 149' | Ser | 7.840               | 120.691 | 178.548     | 59.827            | 64.780           |
| 150' | Lys | -                   | -       | -           | -                 | -                |
| 151' | Ile | -                   | -       | -           | -                 | -                |
| 152' | Phe | -                   | -       | -           | -                 | -                |
| 153' | Lys | -                   | -       | -           | -                 | -                |
| 154' | Leu | -                   | -       | -           | -                 | -                |
| 155' | Gly | -                   | -       | -           | -                 | -                |
| 156' | Gly | 8.176               | 108.249 | 174.297     | 45.289            | -                |
| 157' | Arg | 8.217               | 120.281 | 176.139     | 55.950            | 30.859           |
| 158' | Asp | 8.505               | 121.374 | 175.190     | 54.119            | 40.766           |
| 159' | Ser | 7.840               | 120.691 | 178.548     | 59.827            | 64.780           |

**Figure S1:** Potential  $\alpha$ -helical molecular recognition fragments (A) in the intrinsically disordered 18.5-kDa “classic” murine MBP isoform (B). The amino acid sequence of murine recombinant MBP (rmMBP, or rmC1 for the unmodified form) consists of 168 residues with an additional LEH<sub>6</sub> purification tag at the C-terminus of the protein (panel B); the N-terminal methionine is cleaved post-translationally and is not included in numbering. Three rectangles represent the sequences of polypeptides generated for the purpose of the present study (A22-K56, S72-S107, S133-S159, for  $\alpha$ 1,  $\alpha$ 2, and  $\alpha$ 3, respectively). The insets in panel (A) show strongly amphipathic  $\alpha$ -helical regions in the rmC1 sequence suggested also by solution NMR studies (11;17), *inter alia*. Arrows show the vertical alignment of hydrophobic moment vector. The helical wheel representations were redrawn from the results generated using the HeliQuest program (<http://heliquest.ipmc.cnrs.fr/>), and are adapted from reference (11).

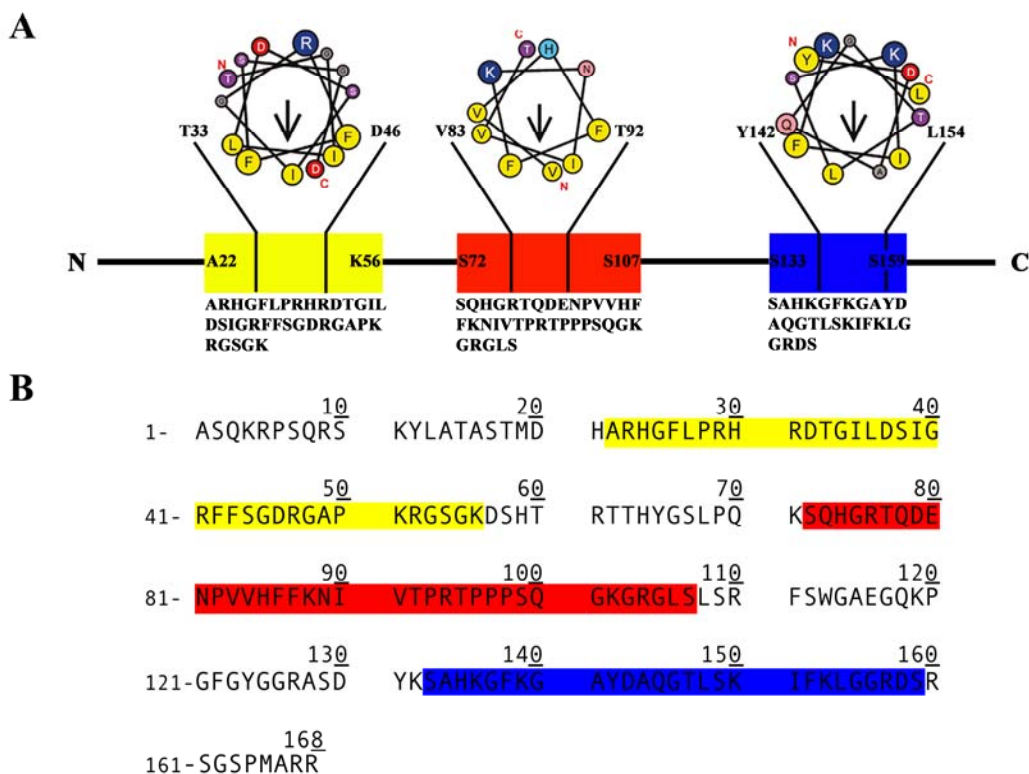

**Figure S2:** Expression and purification of recombinant murine 18.5 kDa MBP (unmodified rmC1 variant)  $\alpha$ -peptides. Three MBP- $\alpha$ -peptides ( $\alpha$ 1,  $\alpha$ 2, and  $\alpha$ 3) were expressed using the Champion™ pET SUMO Expression System. Peptides fused with SUMO at their N-terminus were over-expressed and purified using immobilized Ni<sup>2+</sup>-affinity chromatography. The SDS-PAGE analyses presented on the left-hand side of panels (A,C,E) compare the crude lysates “C” and the eluates “E” of three MBP-derived SUMO-peptides ( $\alpha$ 1,  $\alpha$ 2, and  $\alpha$ 3, respectively). The right-hand sides of panels (A,C,E) confirm the enzymatic cleavage of SUMO (lane D) from the peptides by Tricine-PAGE analysis. Peptides were further purified by the second round of immobilized Ni<sup>2+</sup>-affinity chromatography followed by an HPLC polishing step. The final purity of the MBP- $\alpha$ -peptides was assessed by analytical HPLC, as shown in panels (B,D,F) for  $\alpha$ 1,  $\alpha$ 2, and  $\alpha$ 3, respectively.

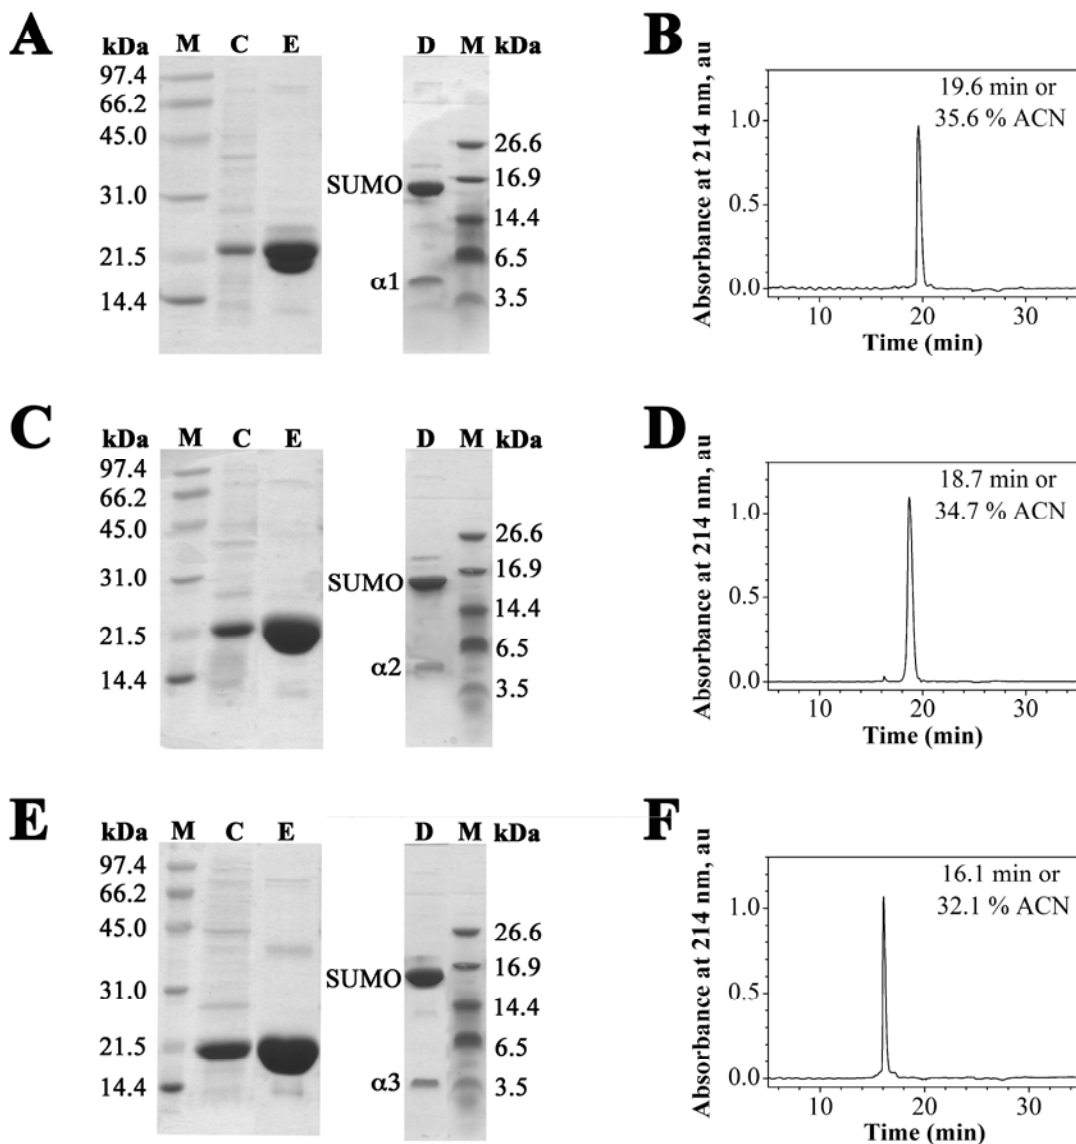

**Figure S3:** Circular dichroism (CD) spectroscopy of MBP-derived peptides in different chemical environments. The CD spectra under 8 different conditions of 0.5 mg/mL of  $\alpha 1$ -,  $\alpha 2$ -, and  $\alpha 3$ -peptides are shown in panels (A and D), (B and E), and (C and F), respectively. Panels (A,B,C) and (D,E,F) compare the effects of TFE and DPC, respectively. Solid line: 20 mM Tris-H<sub>2</sub>SO<sub>4</sub>, pH 7.4, 100 mM Na<sub>2</sub>SO<sub>4</sub>; dashed line: 10% TFE or 0.5 mM DPC; dotted line: 30% TFE or 1 mM DPC; dashed-dotted line: 40% TFE or 10 mM DPC; and dash-dot-dotted line: 30 mM DPC.

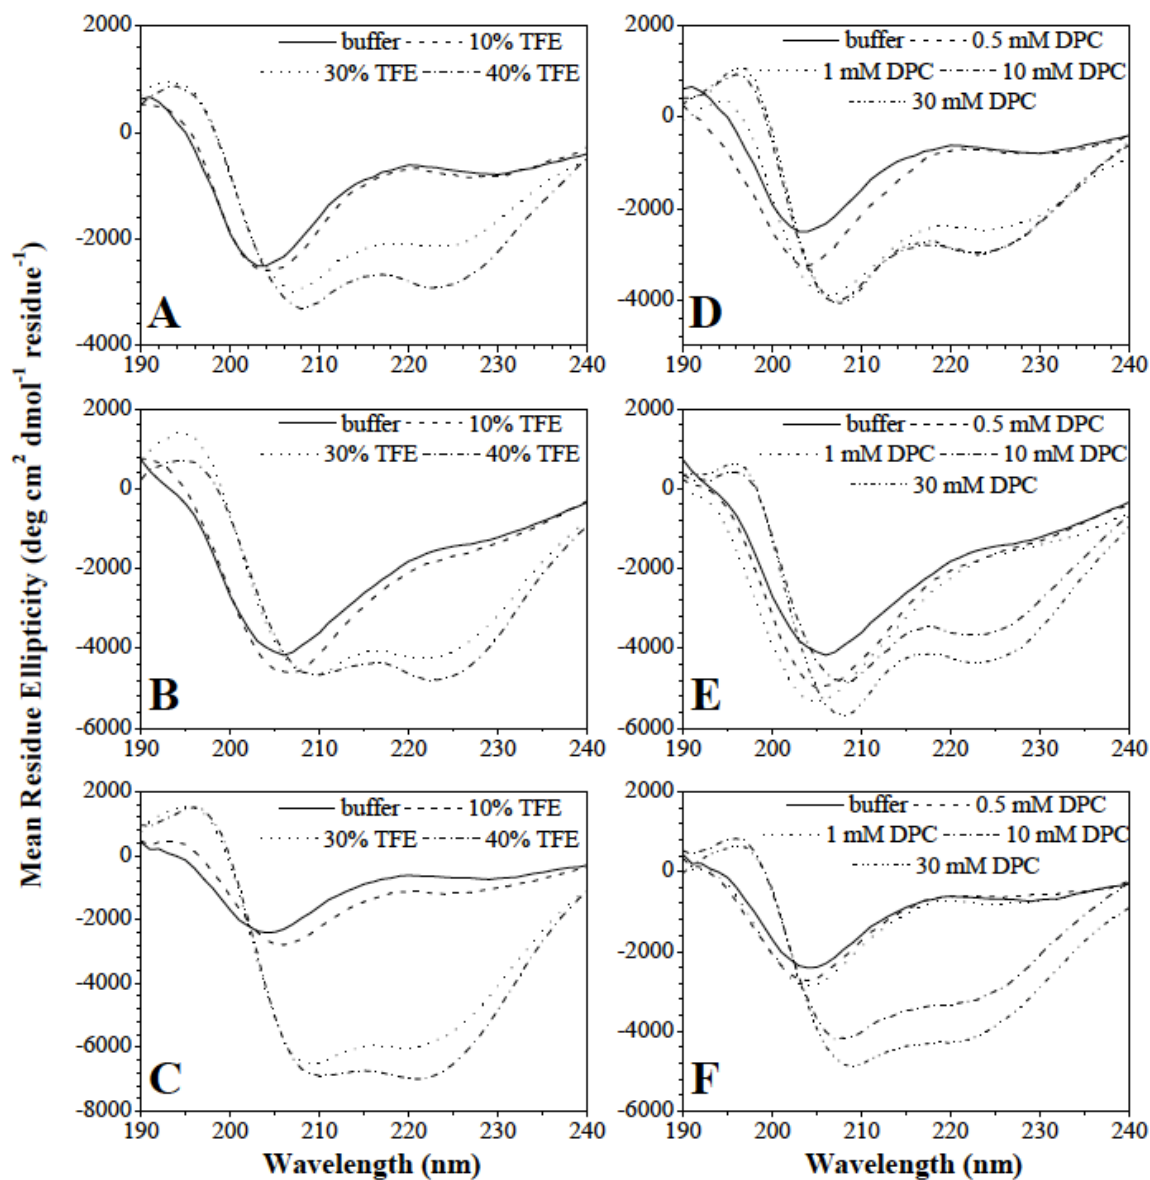

**Figure S4:** Transmission electron microscopy (TEM) of the actin assembly induced by MBP-derived peptides. The MBP- $\alpha$ -peptides:  $\alpha 1$  (A),  $\alpha 2$  (B), and  $\alpha 3$  (C), were added to 5  $\mu\text{M}$  of G-actin (D) at a 4.5 to 1 peptide:actin molar ratio. Following a 1 h incubation at room temperature, samples were stained with uranyl acetate, and the TEM image was captured on a Philips CM10 transmission electron microscope. All scale bars represent 200 nm at the object level.

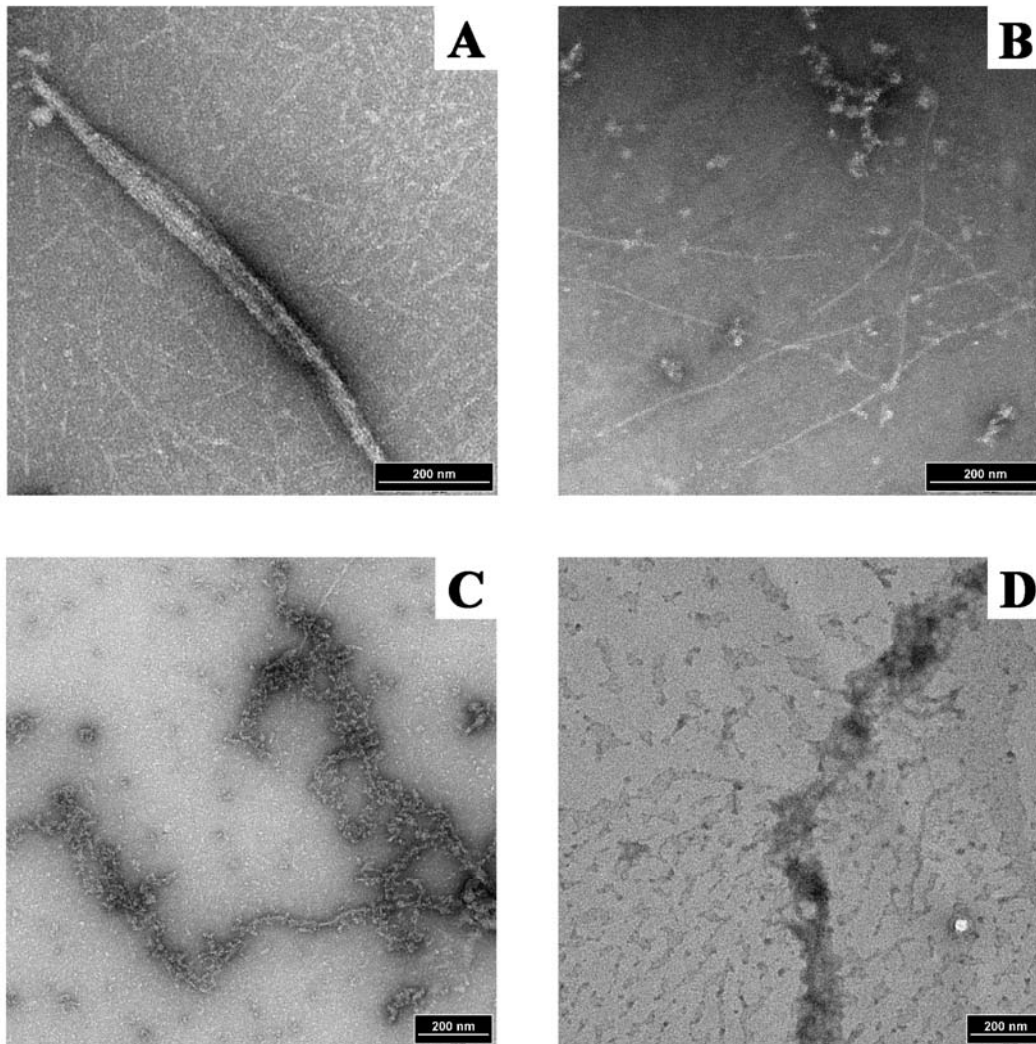

**Figure S5:** Demonstration of Tricine-PAGE-based assessment of actin bundling and binding by the N-terminal  $\alpha 1$ -peptide in the presence and absence of DPC. Shown is a representative binding experiment, where 5  $\mu\text{M}$  of G-actin was mixed with different concentrations of  $\alpha 1$ -peptide in G-buffer to reach the molar ratios indicated above the gels. Reaction mixtures were analyzed as indicated in the Materials and Methods section for the presence of bound and free peptide. **(A)** Proteins in the pellet following sedimentation assay; **(B)** supernatants of the corresponding reaction mixture; **(C)** binding plot of fractional saturation vs. free peptide.

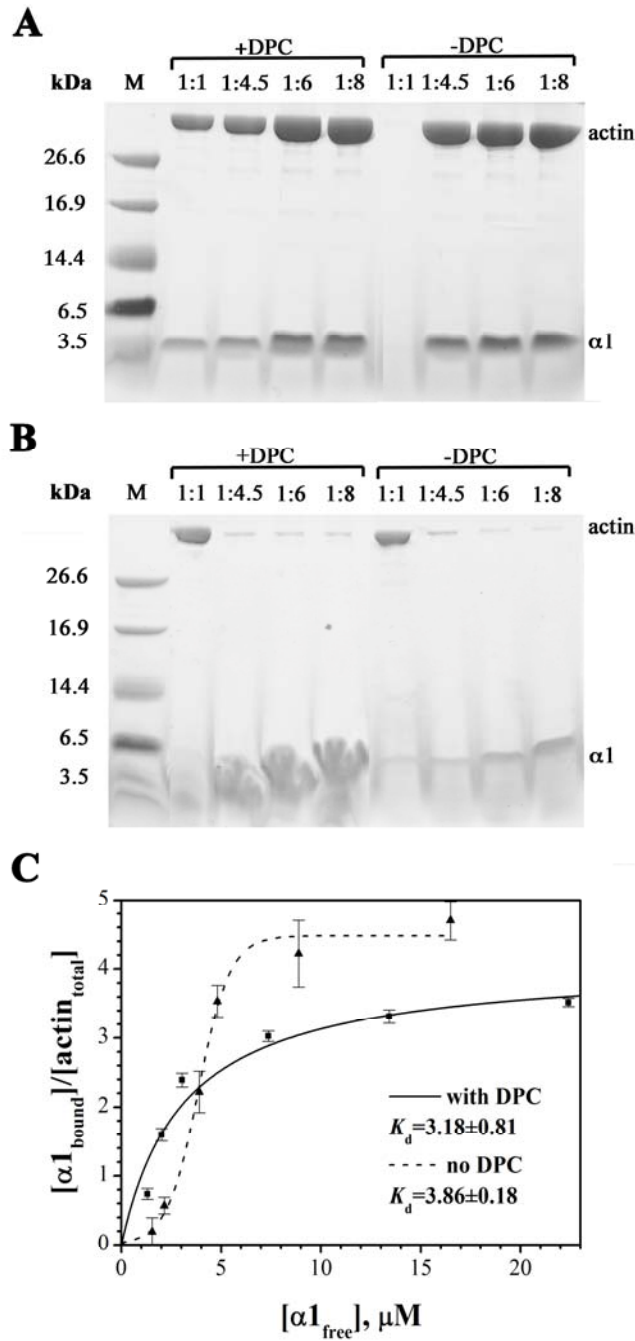



**Figure S6:** Sample strip-plot of HN(CA)CO (top), and HNCACB (bottom), for the fragment of the C-terminal  $\alpha 3$ -peptide, corresponding to residues (G155-S159) of the full-length 18.5 kDa murine MBP. Red contours are due to positive  $C'$  and  $C^\alpha$  peaks, whereas blue contours represent negative  $C^\beta$  peaks.

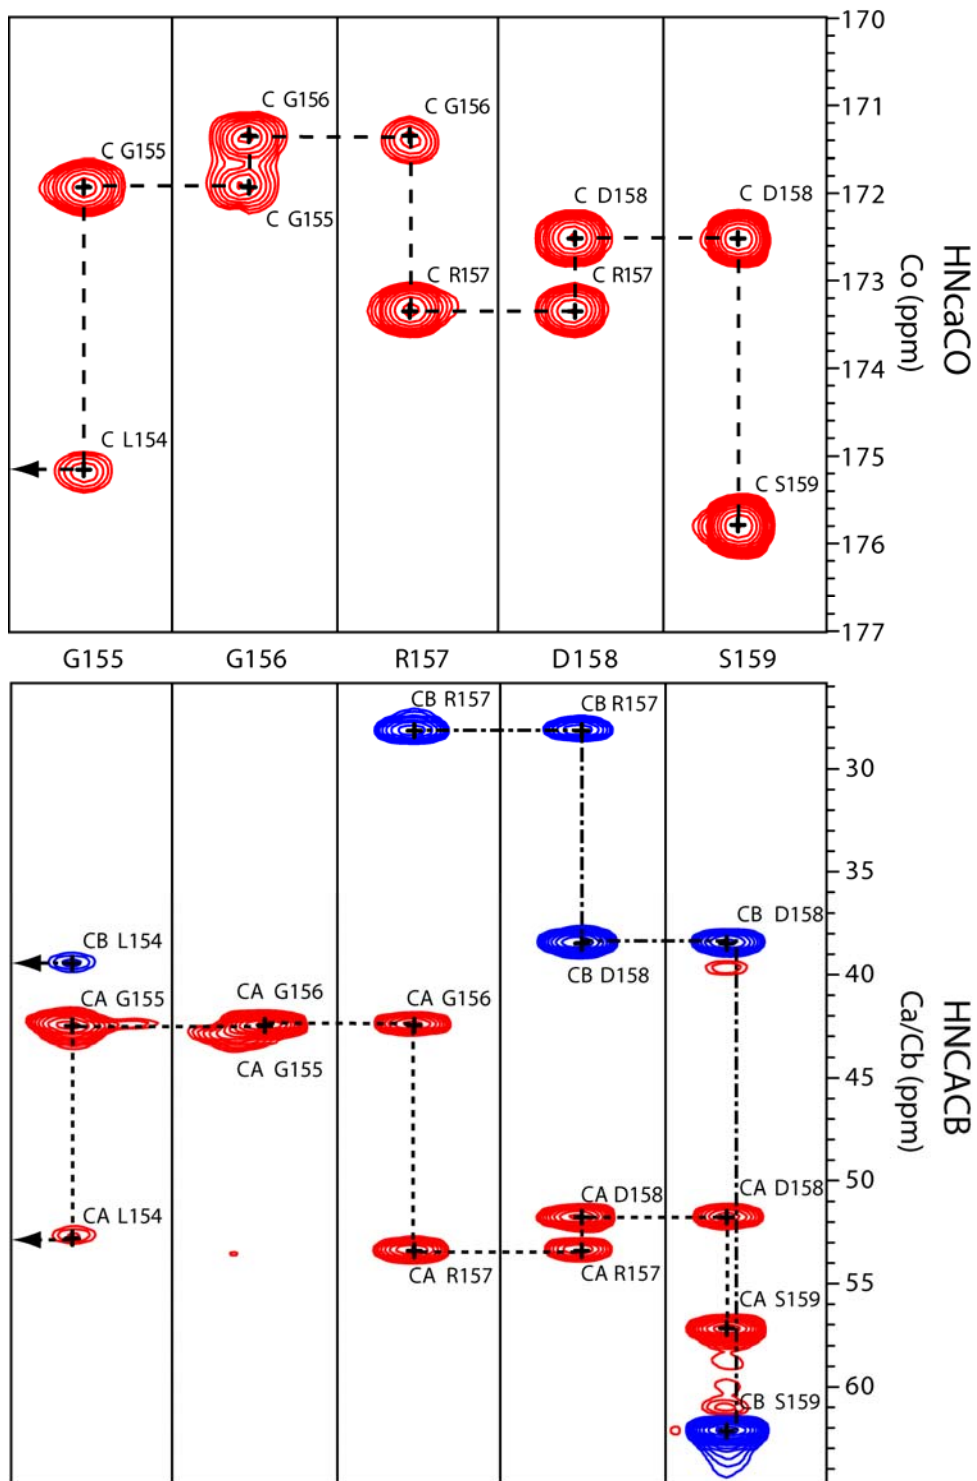

**Figure S7:** The  $^1\text{H}$ - $^{15}\text{N}$  HSQC spectra for the C-terminal  $\alpha 3$ -peptide alone, for the  $\alpha 3$ - $\text{Ca}^{2+}$ -CaM complexes at a 1:1 molar ratio, and for the  $\alpha 3$ - $\text{Ca}^{2+}$ -CaM complexes at a 1:1 molar ratio titrated with EDTA-EGTA to a maximum concentration of 5 mM (4 mM EDTA and 1 mM EGTA). All spectra were acquired using identical acquisition parameters and at the same temperature as the HSQC spectrum for the  $\alpha 3$ -peptide alone as given in **Table S1**.

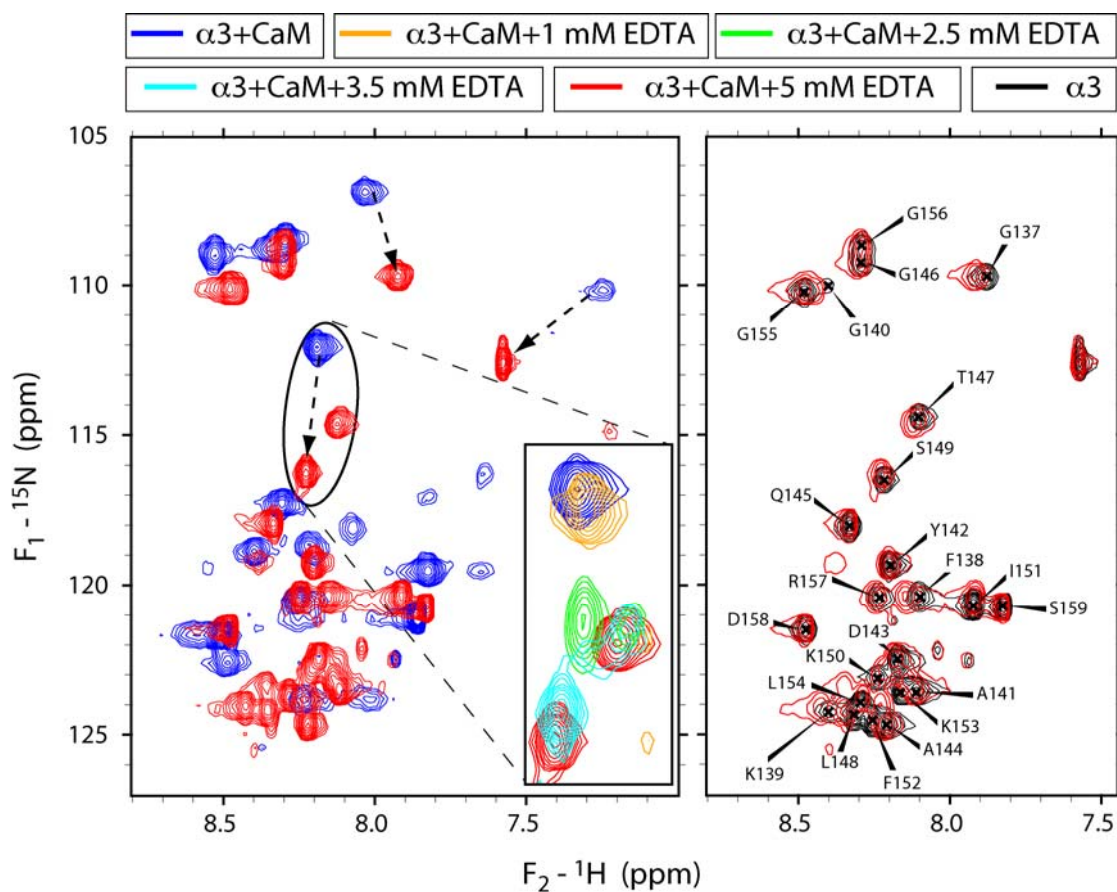

**Figure S8:** The  $^1\text{H}$ - $^{15}\text{N}$  HSQC spectra for the N-terminal  $\alpha 1$ -peptide, and for the  $\alpha 1$ - $\text{Ca}^{2+}$ -CaM complexes at 1:1 and lesser molar ratios (both zoom-in regions in the insets).

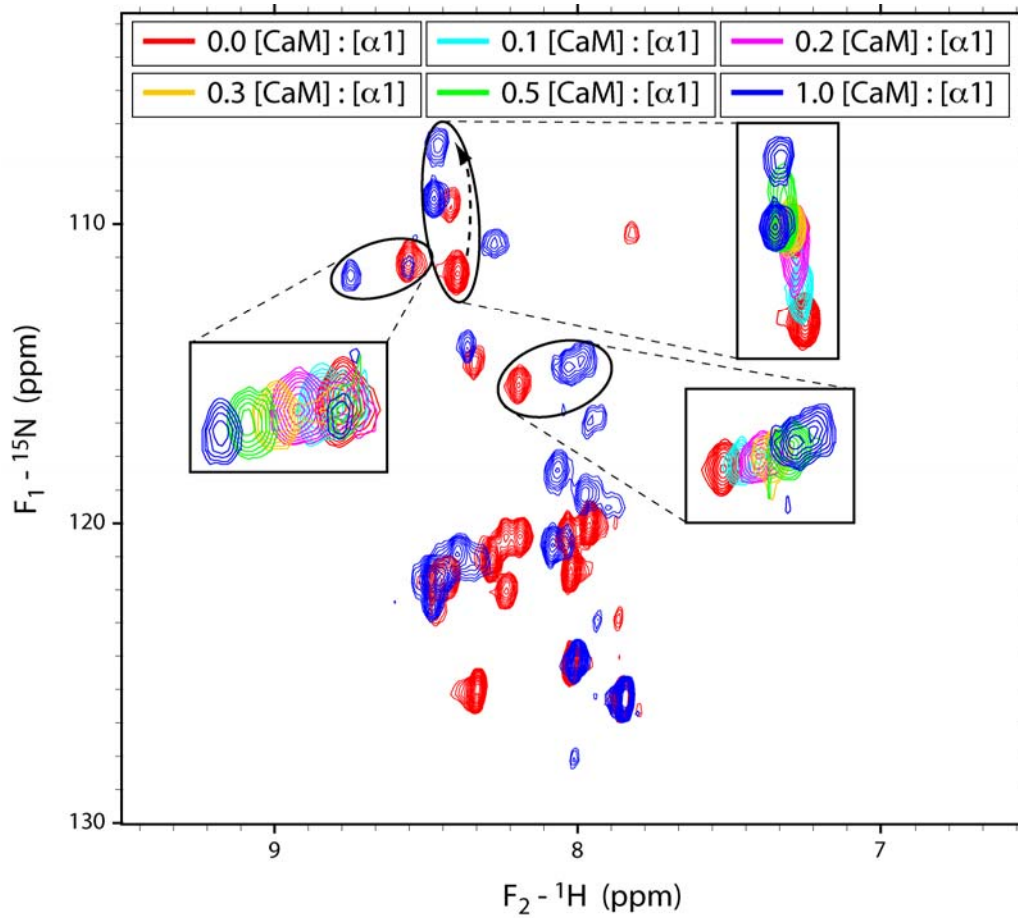

## SUPPORTING REFERENCES

1. Ahmed, M.A.M., V.V. Bamm, L. Shi, M. Steiner-Mosonyi, J.F. Dawson, L. Brown, G. Harauz, and V. Ladizhansky. 2009. Induced secondary structure and polymorphism in an intrinsically disordered structural linker of the CNS: Solid-state NMR and FTIR spectroscopy of myelin basic protein bound to actin. *Biophys. J.* 96:180-191.
2. Bamm, V.V., M.A. Ahmed, and G. Harauz. 2010. Interaction of myelin basic protein with actin in the presence of dodecylphosphocholine micelles. *Biochemistry* 49:6903-6915.
3. Bartlett, G. 1959. Phosphorus assay in column chromatography. *J. Biol. Chem.* 234:466-468.
4. Bates, I.R., P. Matharu, N. Ishiyama, D. Rochon, D.D. Wood, E. Polverini, M.A. Moscarello, N.J. Viner, and G. Harauz. 2000. Characterization of a recombinant murine 18.5-kDa myelin basic protein. *Protein Expr. Purif.* 20:285-299.
5. Boggs, J.M., G. Rangaraj, W. Gao, and Y.M. Heng. 2006. Effect of phosphorylation of myelin basic protein by MAPK on its interactions with actin and actin binding to a lipid membrane *in vitro*. *Biochemistry* 45:391-401.
6. Cavanagh, J., W. J. Fairbrother, A. G. Palmer, and N. J. Skelton. 1996. Protein NMR Spectroscopy. Principles and Practice. Academic Press (Elsevier Science), San Diego.
7. Clubb, R.T., V. Thanabal, and G. Wagner. 1992. A constant-time 3-dimensional triple-resonance pulse scheme to correlate intraresidue H-1(N), N-15, and C-13(′) chemical-shifts in N-15-C-13-Labeled Proteins. *Journal of Magnetic Resonance* 97:213-217.
8. Delaglio, F., S. Grzesiek, G.W. Vuister, G. Zhu, J. Pfeifer, and A. Bax. 1995. NMRPipe: a multidimensional spectral processing system based on UNIX pipes. *J. Biomol. NMR* 6:277-293.
9. Grzesiek, S. and A. Bax. 1992. Improved 3D triple-resonance NMR techniques applied to a 31-kDa protein. *Journal of Magnetic Resonance* 96:432-440.
10. Grzesiek, S. and A. Bax. 1993. Amino acid type determination in the sequential assignment procedure of uniformly <sup>13</sup>C/<sup>15</sup>N-enriched proteins. *J. Biomol. NMR* 3:185-204.
11. Harauz, G., V. Ladizhansky, and J.M. Boggs. 2009. Structural polymorphism and multifunctionality of myelin basic protein. *Biochemistry* 48:8094-8104.
12. Harauz, G. and D.S. Libich. 2009. The classic basic protein of myelin - conserved structural motifs and the dynamic molecular barcode involved in membrane adhesion and protein-protein interactions. *Current Protein and Peptide Science* 10:196-215.

13. Kay, L.E., P. Keifer, and T. Saarinen. 1992. Pure absorption gradient-enhanced heteronuclear single quantum correlation spectroscopy with improved sensitivity. *J. Am. Chem. Soc.* 114:10663-10665.
14. Kay, L.E., G.Y. Xu, and T. Yamazaki. 1994. Enhanced-sensitivity triple-resonance spectroscopy with minimal H<sub>2</sub>O saturation. *Journal of Magnetic Resonance Series A* 109:129-133.
15. Keller, R. 2007. The computer-aided resonance assignment tutorial. Cantina-Verlag, Goldau, Switzerland.
16. Kouyama, T. and K. Mihashi. 1981. Fluorimetry study of N-(1-pyrenyl)iodoacetamide-labelled F-actin. Local structural change of actin protomer both on polymerization and on binding of heavy meromyosin. *Eur. J. Biochem.* 114:33-38.
17. Libich, D.S. and G. Harauz. 2008. Backbone dynamics of the 18.5 kDa isoform of myelin basic protein reveals transient  $\alpha$ -helices and a calmodulin-binding site. *Biophys. J.* 94:4847-4866.
18. Libich, D.S., C.M.D. Hill, I.R. Bates, F.R. Hallett, S. Armstrong, A. Siemiarczuk, and G. Harauz. 2003. Interaction of the 18.5-kD isoform of myelin basic protein with Ca<sup>2+</sup>-calmodulin: effects of deimination assessed by intrinsic Trp fluorescence spectroscopy, dynamic light scattering, and circular dichroism. *Protein Sci.* 12:1507-1521.
19. Libich, D.S., C.M.D. Hill, J.D. Haines, and G. Harauz. 2003. Myelin basic protein has multiple calmodulin-binding sites. *Biochem. Biophys. Res. Commun.* 308:313-319.
20. Lukas, T.J., W.H. Burgess, F.G. Prendergast, W. Lau, and D.M. Watterson. 1986. Calmodulin binding domains: characterization of a phosphorylation and calmodulin binding site from myosin light chain kinase. *Biochemistry* 25:1458-1464.
21. Majava, V., M.V. Petoukhov, N. Hayashi, P. Pirila, D.I. Svergun, and P. Kursula. 2008. Interaction between the C-terminal region of human myelin basic protein and calmodulin: analysis of complex formation and solution structure. *BMC Struct. Biol.* 8:10.
22. Marion, D., M. Ikura, R. Tschudin, and A. Bax. 1989. Rapid recording of 2D NMR spectra without phase cycling - Application to the study of hydrogen-exchange in proteins. *Journal of Magnetic Resonance* 85:393-399.
23. Mossessova, E. and C.D. Lima. 2000. Ulp1-SUMO crystal structure and genetic analysis reveal conserved interactions and a regulatory element essential for cell growth in yeast. *Mol. Cell* 5:865-876.
24. Muhandiram, D.R. and L.E. Kay. 1994. Gradient-Enhanced Triple-Resonance 3-Dimensional NMR Experiments with Improved Sensitivity. *Journal of Magnetic Resonance Series B* 103:203-216.

25. Palmer, A.G., J. Cavanagh, P.E. Wright, and M. Rance. 1991. Sensitivity improvement in proton-detected 2-dimensional heteronuclear correlation NMR spectroscopy. *Journal of Magnetic Resonance* 93:151-170.
26. Pardee, J.D. and J.A. Spudich. 1982. Purification of muscle actin. *Methods Cell Biol.* 24:271-289.
27. Porumb, T., A. Crivici, P.J. Blackshear, and M. Ikura. 1997. Calcium binding and conformational properties of calmodulin complexed with peptides derived from myristoylated alanine-rich C kinase substrate (MARCKS) and MARCKS-related protein (MRP). *Eur. Biophys. J.* 25:239-247.
28. Schägger, H. and G. von Jagow. 1987. Tricine-sodium dodecyl sulfate-polyacrylamide gel electrophoresis for the separation of proteins in the range from 1 to 100 kDa. *Anal. Biochem.* 166:368-379.
29. Schleucher, J., M. Sattler, and C. Griesinger. 1993. Coherence selection by gradients without signal attenuation - Application to the 3-dimensional HNCO experiment. *Angewandte Chemie-International Edition in English* 32:1489-1491.
30. Schleucher, J., M. Schwendinger, M. Sattler, P. Schmidt, O. Schedletzky, S.J. Glaser, O.W. Sorensen, and C. Griesinger. 1994. A general enhancement scheme in heteronuclear multidimensional NMR employing pulsed field gradients. *J. Biomol. NMR* 4:301-306.
31. Wittekind, M. and L. Mueller. 1993. HNCACB, A high-sensitivity 3D NMR experiment to correlate amide-proton and nitrogen resonances with the alpha-carbon and beta-carbon resonances in proteins. *Journal of Magnetic Resonance Series B* 101:201-205.
